# Supplementary material for: Experiments on patterns of alluvial cover and bedrock erosion in a meandering channel
Source: Copernicus journal article supplement (doi:10.5194/esurf-2019-8), 2019-02-27
Supplement: Supplementary file 1 [file esurf-2019-8-supplement.zip]

Archive with 3 entries (2 files):
- Supplemental/
- Supplemental/S1 Information about the image acquisition and processing.pdf
- Supplemental/S2 Information about the eTapes.pdf
